# Supplementary material for: Luminescence and a New Approach for Detecting Heat Treatment of Sapphire
Source: Copernicus journal article supplement (doi:10.5194/egusphere-2024-1529), 2024-09-04

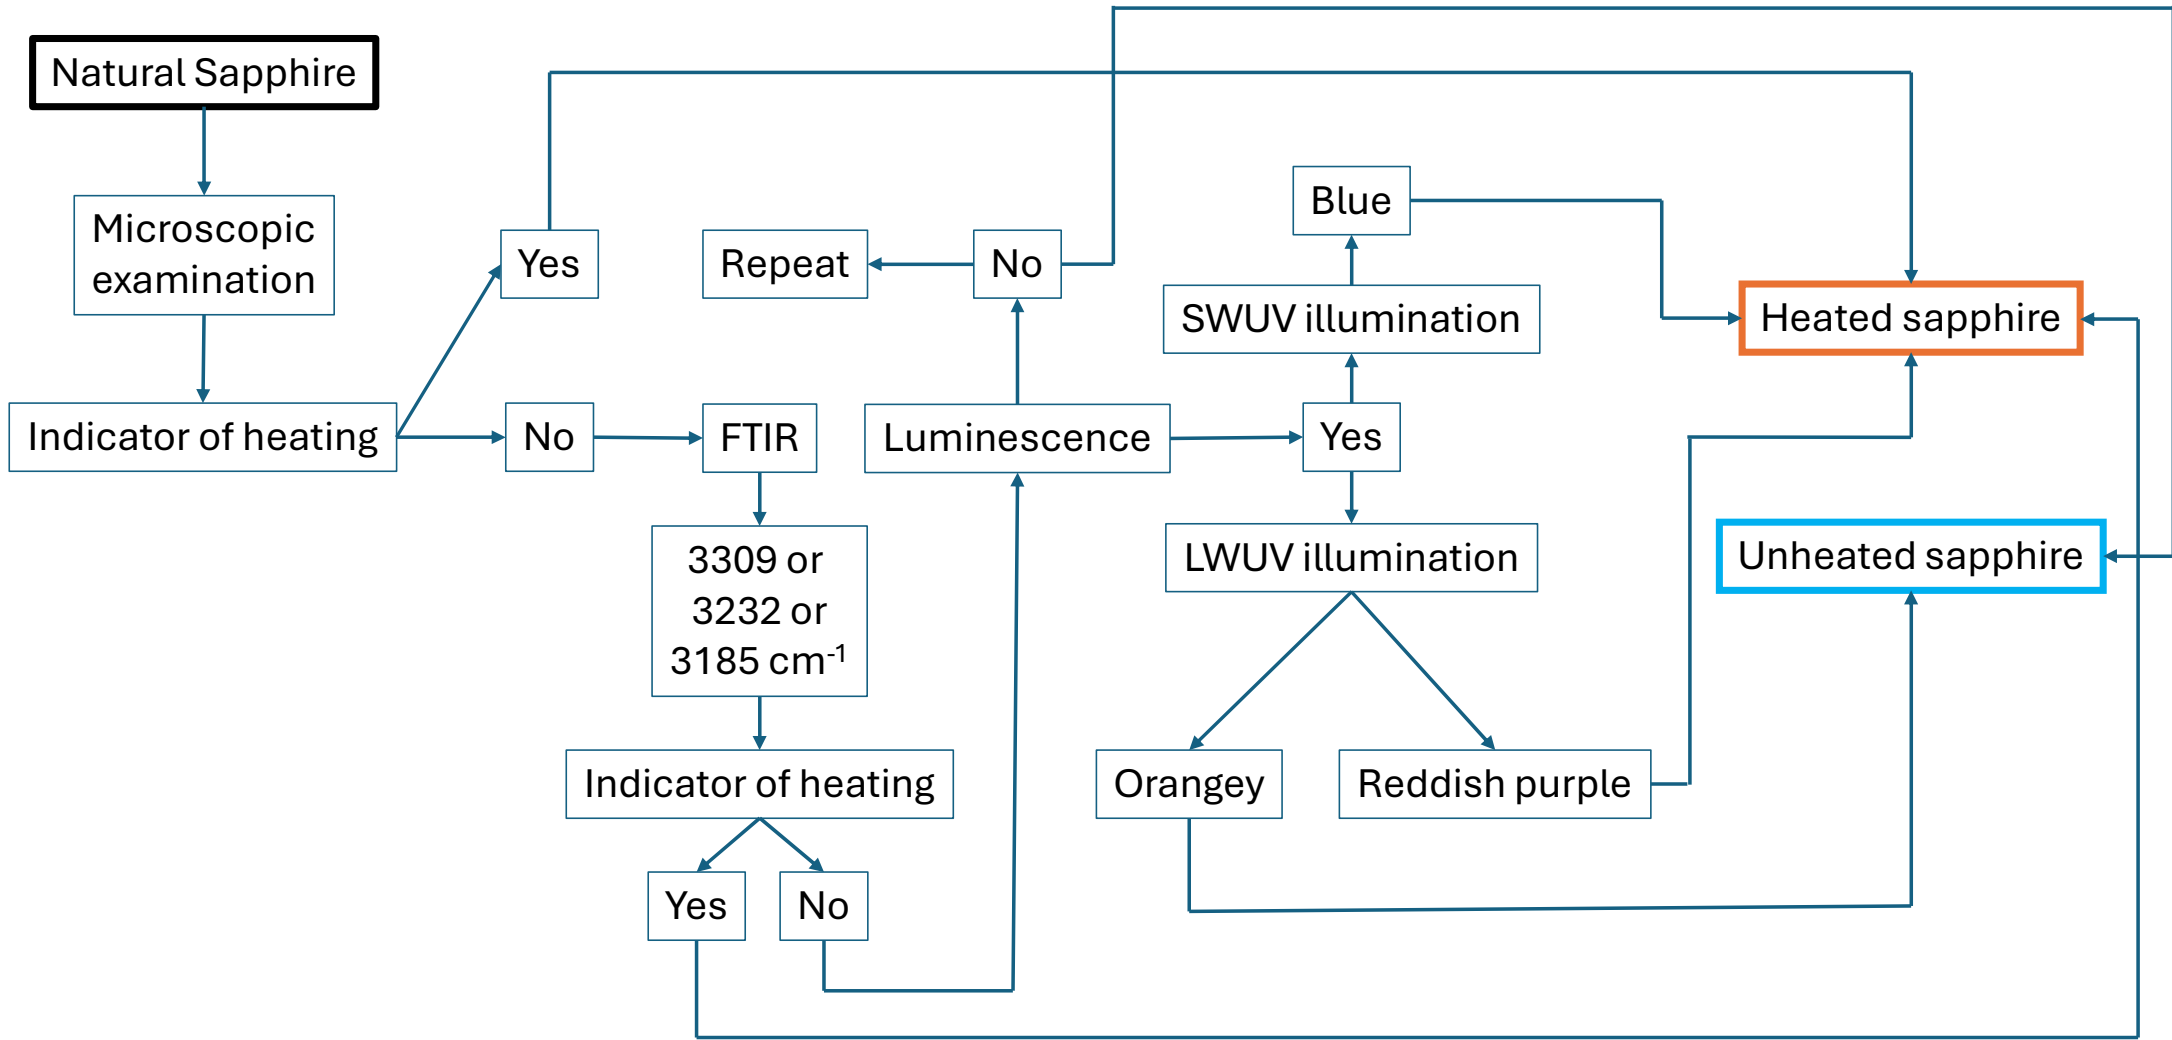

Supplement: Supplementary file [file egusphere-2024-1529-AC2-supplement.pdf]
